# Supplementary material for: Crystallization of (012) oriented calcite single crystals underneath monolayers of tetra(carboxymethoxy)calix[4]arenes
Source: Royal Society of Chemistry journal article supplement (doi:10.1039/b206912a), 2002-01-01
Supplement: b206912a.pdf [file b206912a.pdf]

**Crystallization of (012) Oriented Calcite Single Crystals Underneath Monolayers  
of Tetra(carboxymethoxy)calix[4]arenes**

Dirk Volkmer,\* Marc Fricke, Dieter Vollhardt, and Stefan Siegel

\* Author for correspondence

Dr. D. Volkmer  
Faculty of Chemistry (AC1)  
University of Bielefeld  
D-33501 Bielefeld (Germany)  
P.O. Box 100 131  
Telephone: (+49) 521-106 6142  
Fax: (+49) 521-106 6003  
E-mail: *dirk.volkmer@uni-bielefeld.de*

## Synthesis

Melting points were determined with a Electrothermal melting point apparatus and were uncorrected.  $^1\text{H}$  and  $^{13}\text{C}$  NMR spectra were recorded on a Bruker DRX 500 spectrometer in  $\text{CDCl}_3$  at room temperature (unless stated otherwise) with residual solvent.

Mass spectra were recorded with a Micromass VG Autospec X, Voyager DE spectrometer. Elemental analysis were carried out with a Perkin-Elmer 240 elemental analyzer. All reagents were reagent grade and used without further purification.

### **5,11,17,23-Tetrakis-(1,1,3,3-tetramethylbutyl)-25,26,27,28-tetrahydroxycalix[4]arene:**

was prepared in 34 % yield by analogy to the standard procedure of the *t*-butylcalix[4]arene.<sup>[1]</sup> m.p. 249-251°C (Toluol);  $^1\text{H}$  NMR (500 MHz, 25°C, TMS:  $\delta$  = 9.97 (s, 4 H, OH), 7.18-7.16 (m, 5 H, Tol), 6.99 (s, 8 H, ArH), 4.23 (s, 4 H, Ar-CH<sub>2</sub>), 3.46 (s, 4 H, ArCH<sub>2</sub>), 2.36 (s, 3 H, TolCH<sub>3</sub>), 1.57 (s, 8 H, CCH<sub>2</sub>C), 1.23 (s, 24 H, CH<sub>3</sub>), 0.54 (s, 36 H, CH<sub>3</sub>).  $^{13}\text{C}$  NMR (125 MHz)  $\delta$  = 146.28 (ArCO), 143.05 (ArCtOc), 129.04, 128.23, 127.61 (ArCCH<sub>2</sub>), 126.39 (ArCH), 125.30, 57.26 (CH<sub>2</sub>C(CH<sub>3</sub>)<sub>3</sub>), 37.79 (C(CH<sub>3</sub>)<sub>2</sub>), 32.35 (C(CH<sub>3</sub>)<sub>3</sub>), 32.29 ((CH<sub>3</sub>)<sub>2</sub>C), 31.66 ((CH<sub>3</sub>)<sub>3</sub>C), 31.32 (CH<sub>2</sub>Ar), 21.47.

MS (DCI, isobutane):  $m/z$  (%) 872.4 (95)  $[\text{M}]^+$ , 801.5 (100); elemental analysis calcd for  $\text{C}_{60}\text{H}_{88}\text{O}_4 \cdot \text{C}_7\text{H}_8$ : C 83.35; H 10.02; found: C 83.51, H 9.92.

### **5,11,17,23-Tetrakis-(1,1,3,3-tetramethylbutyl)-25,26,27,28-tetra(ethoxycarbonyl-methoxy)calix[4]arene:**

The product was prepared according to a slightly modified procedure.<sup>[2]</sup> To a well-stirred suspension of 5,11,17,23-Tetrakis-(1,1,3,3-tetramethylbutyl)-25,26,27,28-tetrahydroxycalix[4]arene (14.29 g, 14.8 mmol) in anhydrous acetone (400 mL) was added ethyl bromoacetate (30 mL, 270 mmol) and potassium carbonate (34.5 g, 250 mmol). The mixture was refluxed for 4 d under an argon stream. After filtration, the filtrate was extracted with dichloromethane (3  $\times$  50 mL). The combined organic layers were concentrated in vacuo and the residue was diluted in dichloromethane (300 mL). The solution was washed with hydrochloric acid (50 mL, 1 N) and water (3  $\times$  100 mL). After drying over sodium sulfate, the organic layer was concentrated in vacuo. Subsequently the crude product was recrystallized from ethanol to give the desired product in 73 % yield: m.p. 143 – 145°C;  $^1\text{H}$  NMR (500 MHz, 25°C, TMS:  $\delta$  = 6.74 (s, 8 H, ArH), 4.82 (s, 4 H, Ar-CH<sub>2</sub>), 4.79 (s, 8 H, OCH<sub>2</sub>COO), 4.19 (quart,  $J$  = 7.1 Hz, 8 H, OCH<sub>2</sub>CH<sub>3</sub>), 3.17 (d,  $^3J$  = 13.0 Hz, 4 H, Ar-CH<sub>2</sub>), 1.53 (s, 8 H, CCH<sub>2</sub>C), 1.27 (t,  $^3J$  = 7.1 Hz, 12 H, OCH<sub>2</sub>CH<sub>3</sub>), 1.09 (s, 24 H, CH<sub>3</sub>), 0.69 (s, 36 H, CH<sub>3</sub>).

$^{13}\text{C}$ -NMR (125 MHz)  $\delta$  = 170.51 (COO), 153.05 (ArCO), 144.34 (ArCtOc), 133.05 (ArCCH<sub>2</sub>), 126.14 (ArCH), 71.42 (OCH<sub>2</sub>), 60.27(OCH<sub>2</sub>CH<sub>3</sub>), 57.19 (CH<sub>2</sub>C(CH<sub>3</sub>)<sub>3</sub>), 37.79 (C(CH<sub>3</sub>)<sub>2</sub>), 32.30 (C(CH<sub>3</sub>)<sub>3</sub>), 32.17 (C(CH<sub>3</sub>)<sub>2</sub>), 31.78 (C(CH<sub>3</sub>)<sub>3</sub>), 31.18 (CH<sub>2</sub>Ar), 14.18 (CH<sub>3</sub>).

[<sup>1</sup>] C. D. Gutsche, B. Dhawan, K. H. No, R. Muthukrishnan, *J. Am. Chem. Soc.* **1981**, *103*, 3782–3792.

[<sup>2</sup>] F. Arnaud-Neu, E. M. Collins, M. Deasy, G. Ferguson, S. J. Harris, B. Kaitner, A. J. Lough, M. A. McKerver, E. Marques, B. L. Ruhl, M. J. Schwing Weill, E. M. Seward, *J. Am. Chem. Soc.* **1989**, *111*, 8681–8691.

MS (DCI; ammonia):  $m/z$  (%) 1234.9 (100)  $[M + NH_4]^+$ ; elemental analysis calcd. for  $C_{76}H_{112}O_{12}$ : C 74.96, H 9.27; found: C 74.96, H 9.08.

**5,11,17,23-Tetrakis-(1,1,3,3-tetramethylbutyl)-25,26,27,28-tetra(carboxymethoxy)-calix[4]arene (1):**

The product was prepared according to a slightly modified procedure.<sup>[3]</sup> To a solution of 5,11,17,23-tetrakis-(1,1,3,3-tetramethylbutyl)-25,26,27,28-tetra(ethoxycarbonylmethoxy)calix[4]arene (1.72 g, 1.41 mmol) in tetrahydrofuran (70 mL) was added an aqueous solution of tetramethylammonium hydroxide (25 %, 36 mL, 100 mmol). After 24 h under reflux the suspension was concentrated under reduced pressure, the residue was dissolved in a 1:1 mixture of chloroform/water, washed with hydrochloric acid (2 × 30 mL) and water (3 × 30 mL). The organic layer was concentrated in vacuo and the crude product was recrystallized from acetonitrile (80 mL) to yield the final product in 86 % yield: m.p. 251-252°C ( $CH_3CN$ );  $^1H$  NMR (500 MHz, 50°C, TMS):  $\delta$  = 6.90 (s, 8H, ArH), 4.59 (br s, 12 H (ArCH<sub>2</sub>, CH<sub>2</sub>COO)), 3.25 (d,  $^2J$  = 7.1 Hz, 4 H, ArCH<sub>2</sub>), 1.96 (s, 3 H, CH<sub>3</sub>CN), 1.55 (s, 8 H, CCH<sub>2</sub>C), 1.14 (s, 24 H, CH<sub>3</sub>), 0.66 (s, 36 H, CH<sub>3</sub>).

$^{13}C$ -NMR (125 MHz)  $\delta$  = 145.91 (ArCO), 132.99 (ArCtOc), 126.53 (ArCH, ArCCH<sub>2</sub>), 72.62 (OCH<sub>2</sub>), 57.23(CH<sub>2</sub>C(CH<sub>3</sub>)<sub>3</sub>), 37.98 (C(CH<sub>3</sub>)<sub>2</sub>), 32.34 (C(CH<sub>3</sub>)<sub>3</sub>), 31.64 (C(CH<sub>3</sub>)<sub>2</sub>), 31.05(C(CH<sub>3</sub>)<sub>3</sub>), 30.66 (CH<sub>2</sub>Ar), 1.91 (CH<sub>3</sub>CN).

MALDI-MS (matrix 2,5-dihydroxybenzoic acid):  $m/z$  1127  $[M + Na]^+$ , 1141  $[M + K]^+$ ; elemental analysis calcd for  $C_{76}H_{112}O_{12} \cdot CH_3CN$ : C 73.33, H 8.70, N 1.22; found: C 73.67, H 9.05, N 1.11.

**Calcium complex of 5,11,17,23-Tetrakis-(1,1,3,3-tetramethylbutyl)-25,26,27,28-tetra(carboxymethoxy)calix[4]arene (2):**

5,11,17,23-Tetrakis-(1,1,3,3-tetramethylbutyl)-25,26,27,28-tetra(carboxymethoxy)calix[4]arene (55 mg, 0.05 mmol) was suspended with calcium hydroxide (7.4 mg, 0.1 mmol) in H<sub>2</sub>O (5 mL). The suspension was treated ultrasonically and centrifuged. The pellet was suspended in H<sub>2</sub>O (5 mL), treated ultrasonically and was centrifuged. The wet residue was dissolved in DMSO (5 mL) and crystallized at 98°C. Colourless crystals were obtained after 3 days.

$^1H$  NMR (500 MHz, 50°C, TMS):  $\delta$  = 7.07 (d,  $J$  = 19.1 Hz, 8 H, ArH), 4.27, 3.35 (dd,  $^2J$  = 12.3 Hz, 8 H, ArCH<sub>2</sub>), 5.10, 3.96 (dd,  $^2J$  = 14.3 Hz, 8 H, CH<sub>2</sub>COO), 1.52 (s, 8 H, CCH<sub>2</sub>C), 1.21 (s, 24 H, CH<sub>3</sub>), 0.48 (s, 36 H, CH<sub>3</sub>).

$^{13}C$ -NMR (125 MHz)  $\delta$  = 175.50 (COO), 150.12 (ArCO), 147.41(ArCtOc), 134.45 (ArCCH<sub>2</sub>), 126.72 (ArCH), 77.87 (OCH<sub>2</sub>), 57.23 (CH<sub>2</sub>C(CH<sub>3</sub>)<sub>3</sub>), 40.97 (CSO), 38.05 (C(CH<sub>3</sub>)<sub>2</sub>), 32.31 (C(CH<sub>3</sub>)<sub>3</sub>), 31.47 (C(CH<sub>3</sub>)<sub>2</sub>), 31.07 (C(CH<sub>3</sub>)<sub>3</sub>), 30.72 (CH<sub>2</sub>Ar).

Elemental analysis calcd. for  $[Ca (C_{68}H_{92}O_{12}Ca) (DMSO)_2 (H_2O)] \cdot (DMSO)_{2.5}$ : C 60.33, H 7.90; found: C 58.72, H 7.94.

[<sup>3</sup>] K. Ohto, M. Yano, K. Inoue, T. Yamamoto, M. Goto, F. Nakashio, S. Shinkai, T. Nagasaki, *Anal. Sci.* **1995**, *11*, 893–902.
