# Supplementary figures and images for: Crystallization of (012) oriented calcite single crystals underneath monolayers of tetra(carboxymethoxy)calix[4]arenes
Source: Royal Society of Chemistry journal article supplement (doi:10.1039/b206912a), 2002-01-01

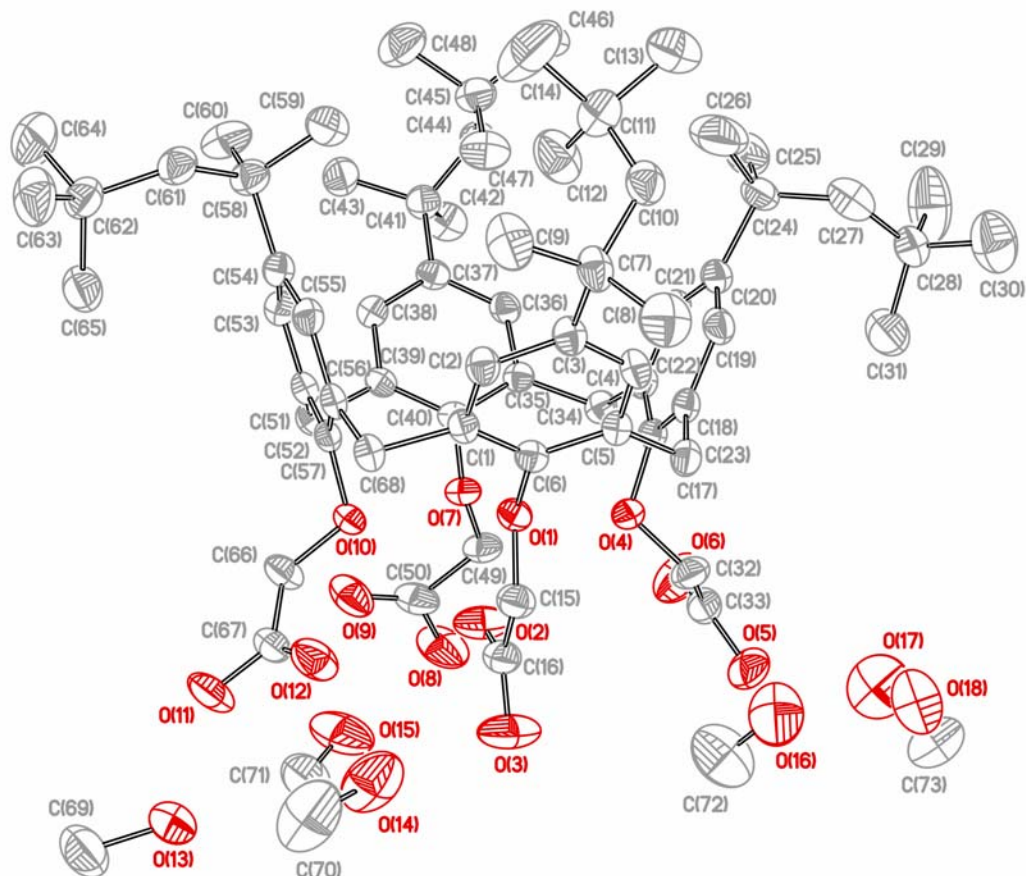

Atom numbering scheme for compound 1.

Supplement: b206912a-1.pdf [file b206912a-1.pdf]

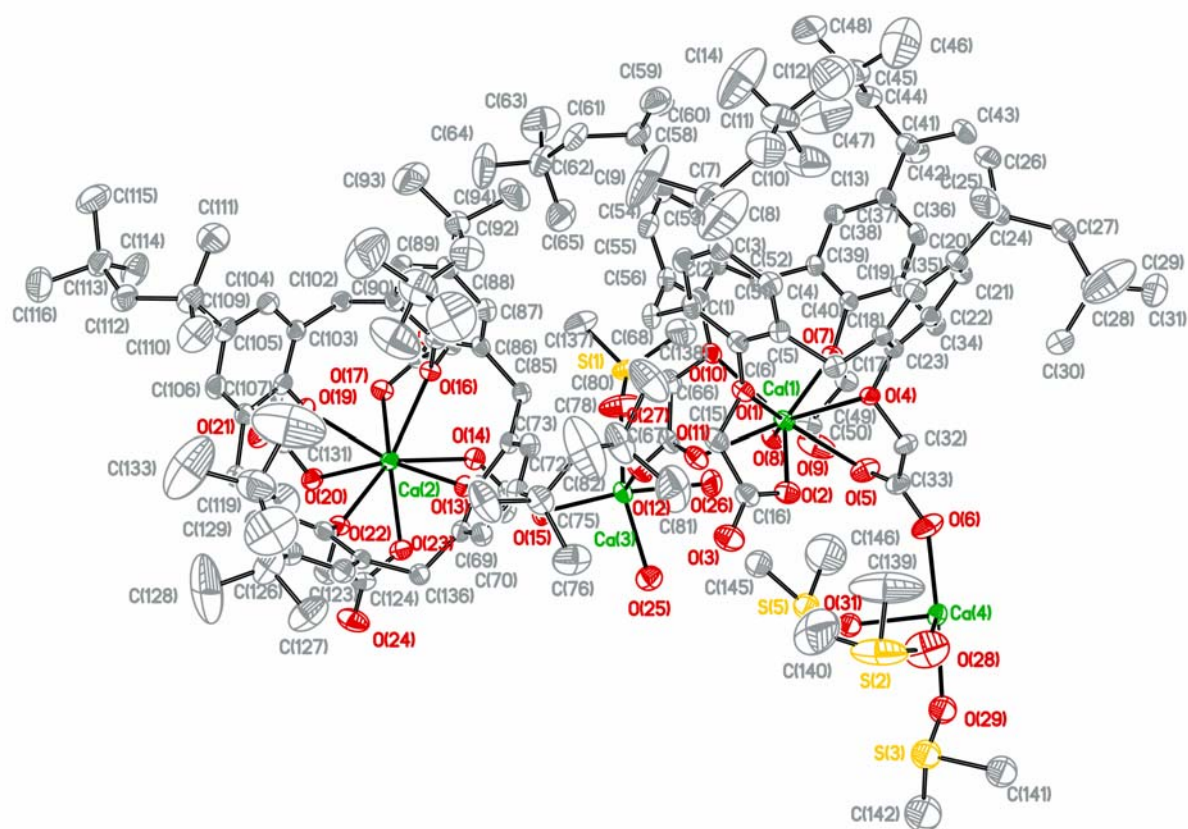

Atom numbering scheme for compound 2. (Lattice solvent molecules not included)

Supplement: b206912a-2.pdf [file b206912a-2.pdf]
